# Supplementary material
Source: publisher figshare collection journal article supplement (https://acs.figshare.com/ndownloader/files/4393342)
Supplement: Supplementary file 1 [file 4393342]

# **Solution-Phase Synthesis of Heteroatom-Substituted Carbon Scaffolds for Hydrogen Storage—Supporting Information**

*Zhong Jin,<sup>†</sup> Zhengzong Sun,<sup>†</sup> Lin J. Simpson,<sup>‡</sup> Kevin J. O'Neill,<sup>‡</sup> Philip A. Parilla,<sup>‡</sup> Yan Li,<sup>§</sup>*

*Nicholas P. Stadie,<sup>||</sup> Channing C. Ahn,<sup>\*,||</sup> Carter Kittrell,<sup>\*,†</sup> and James M. Tour<sup>\*,†</sup>*

<sup>†</sup>Departments of Chemistry, Mechanical Engineering and Materials Science, The Smalley Institute for Nanoscale Science and Technology, Rice University, MS-222, 6100 Main St., Houston, Texas 77005, <sup>‡</sup>National Renewable Energy Laboratory, 1617 Cole Boulevard, Golden, Colorado 80401,

<sup>§</sup>College of Chemistry and Molecular Engineering, Peking University, Beijing 100871, P. R.

China, and <sup>||</sup>W. M. Keck Laboratory, California Institute of Technology, 138-78, Pasadena,

California 91125

E-mail: cca@caltech.edu; kittrell@rice.edu; tour@rice.edu

## **Supporting Information including:**

**S1. HRTEM images of pristine carbon scaffolds**

**S2. XPS survey scans of pristine and heteroatom-substituted carbon scaffolds**

**S3. EFTEM elemental mapping of heteroatom-substituted carbon scaffolds**

**S4. Pore size distribution of pristine and heteroatom-substituted carbon scaffolds**

### S1. HRTEM images of pristine carbon scaffolds

Figure S1a and S1b show graphitic micro-sheets of pristine carbon scaffold sample prepared by the bottom-up procedure. The size distribution of the graphitic micro-sheets is from several hundred nanometers to  $\sim 2\ \mu\text{m}$ . In Figure S1a, 3-5 nm-sized micro domains of graphene nanoflakes can be observed stacked on the surface, which indicates the graphitic micro-sheets were produced from smaller graphene nanoflakes. Figure S1b shows a nanoscale fold near a region of a ridged wrinkle on the graphitic micro-sheets.

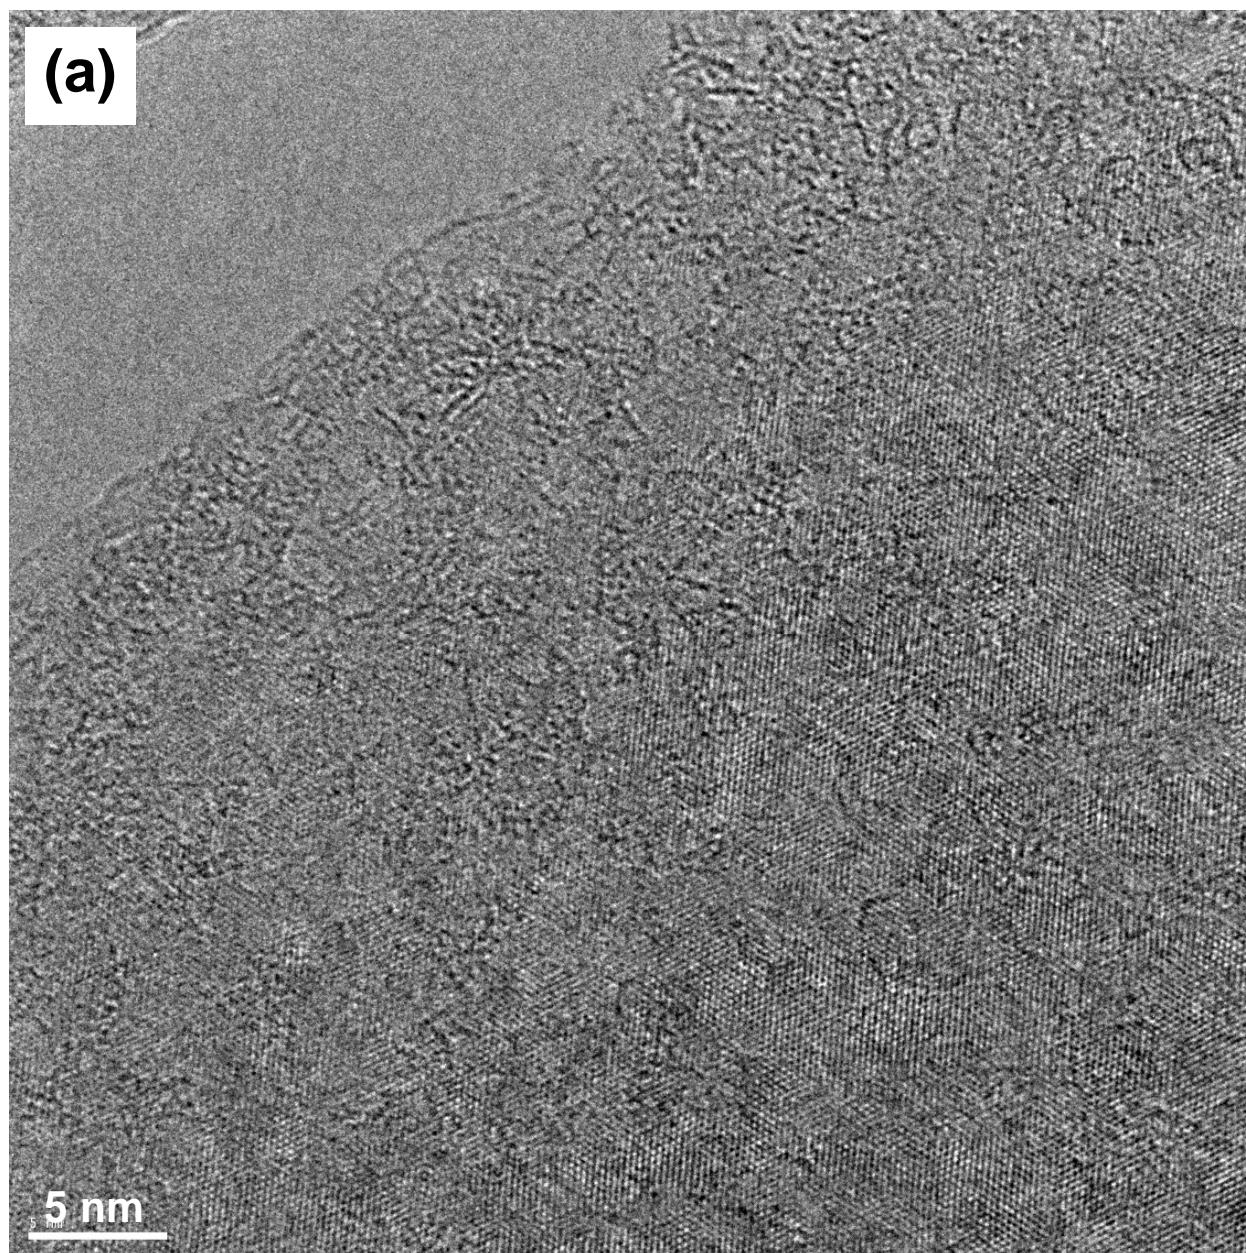

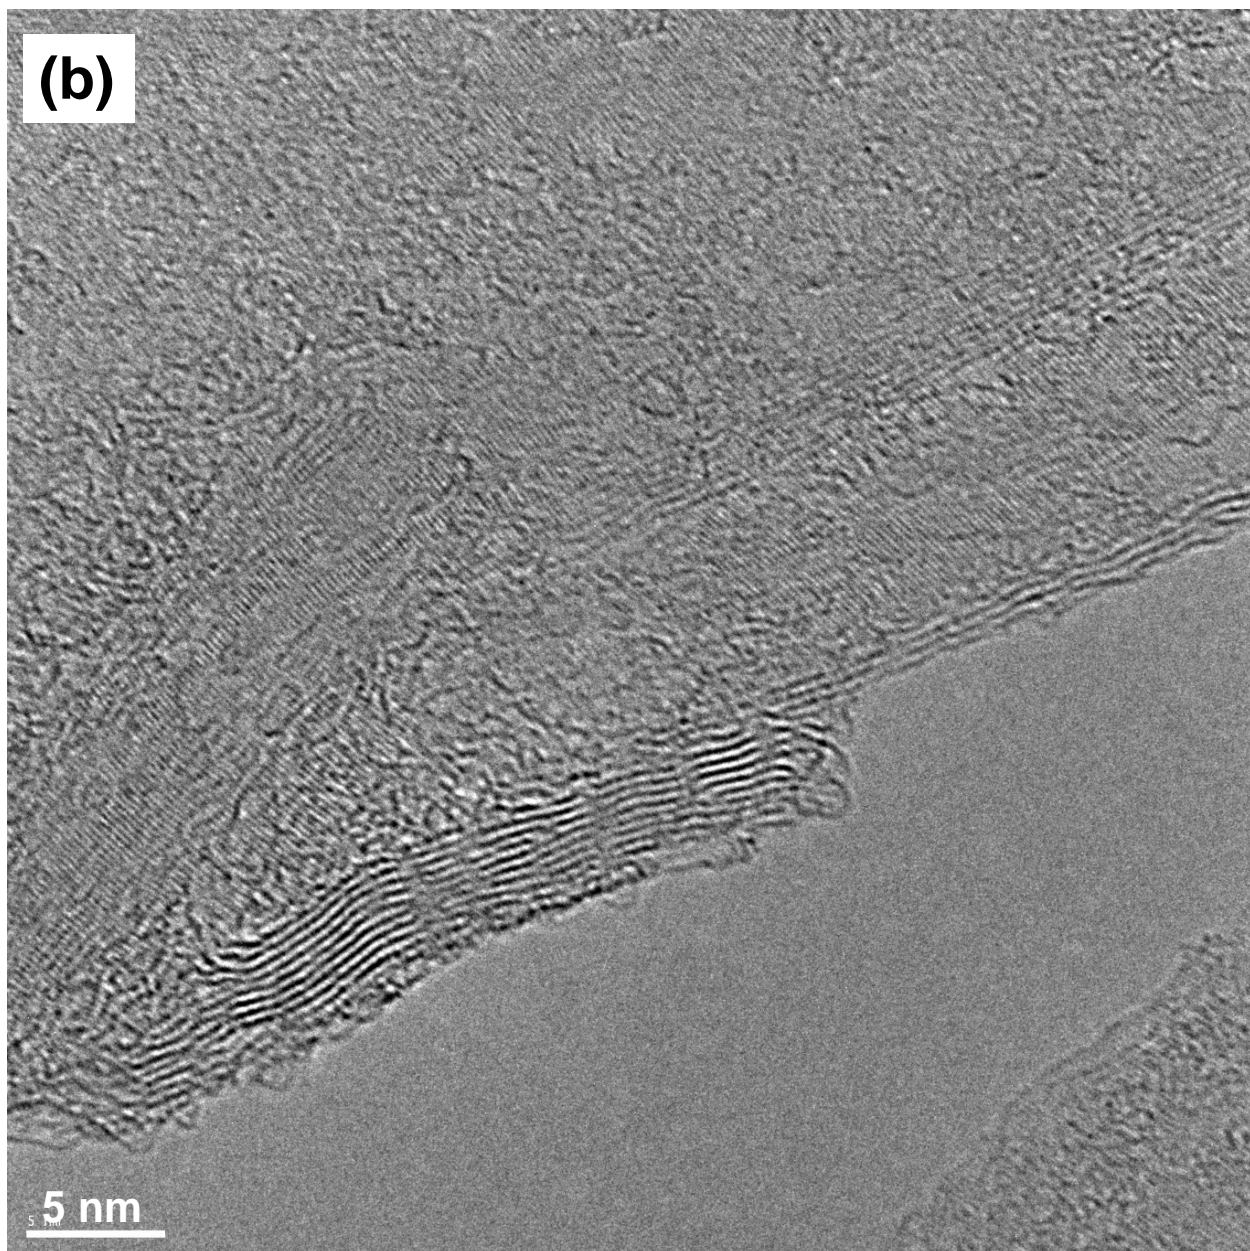

## S2. XPS survey scans of pristine and heteroatom-substituted carbon scaffolds

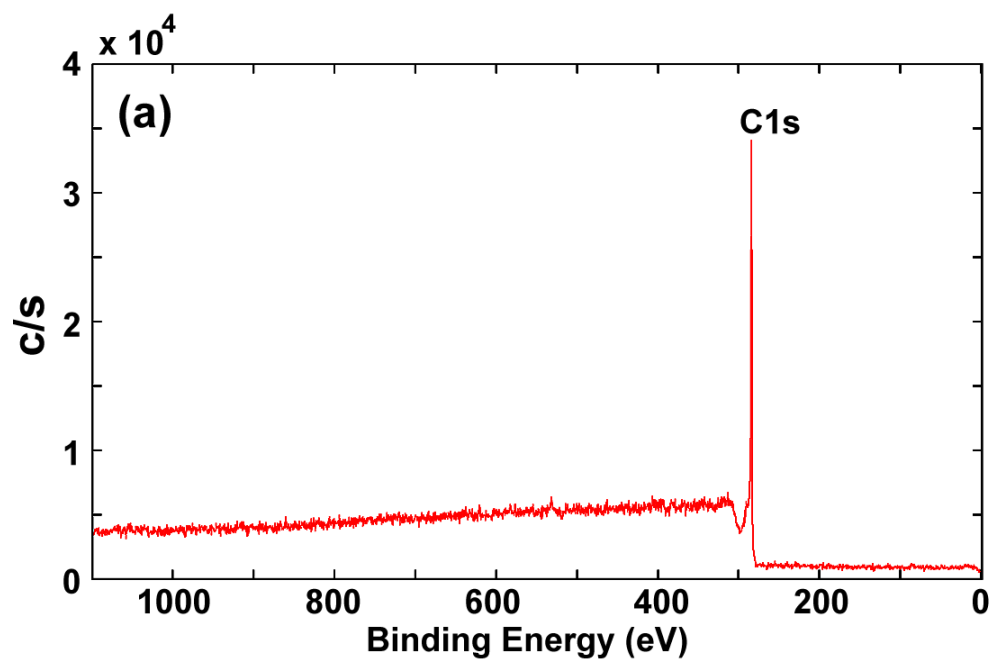

Figure S2a. XPS survey scan of pristine carbon scaffold.

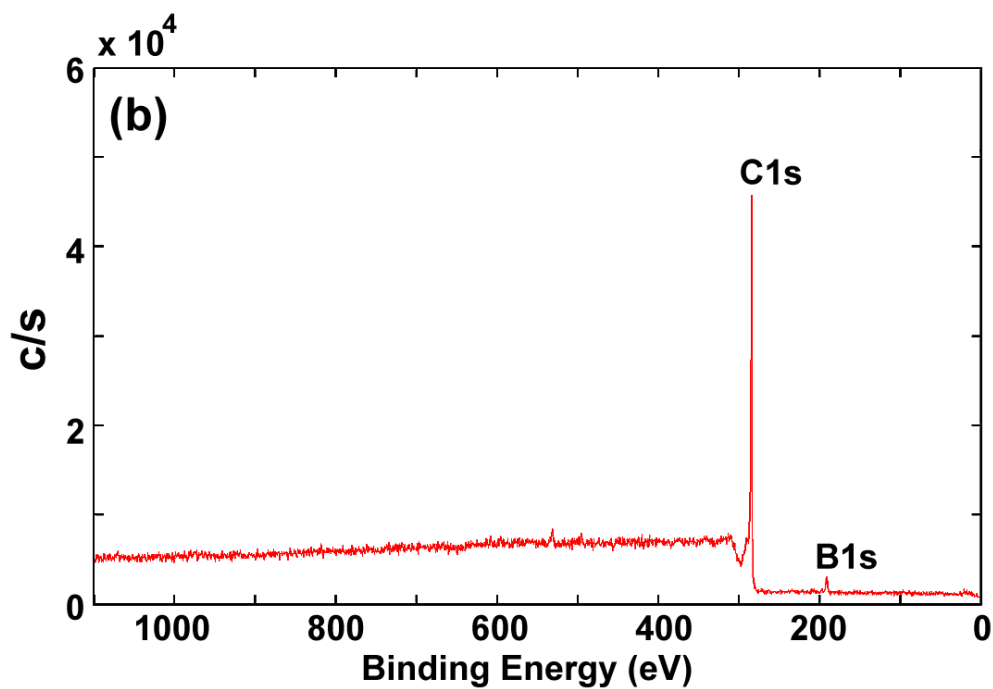

Figure S2b. XPS survey scan of boron-substituted carbon scaffold.

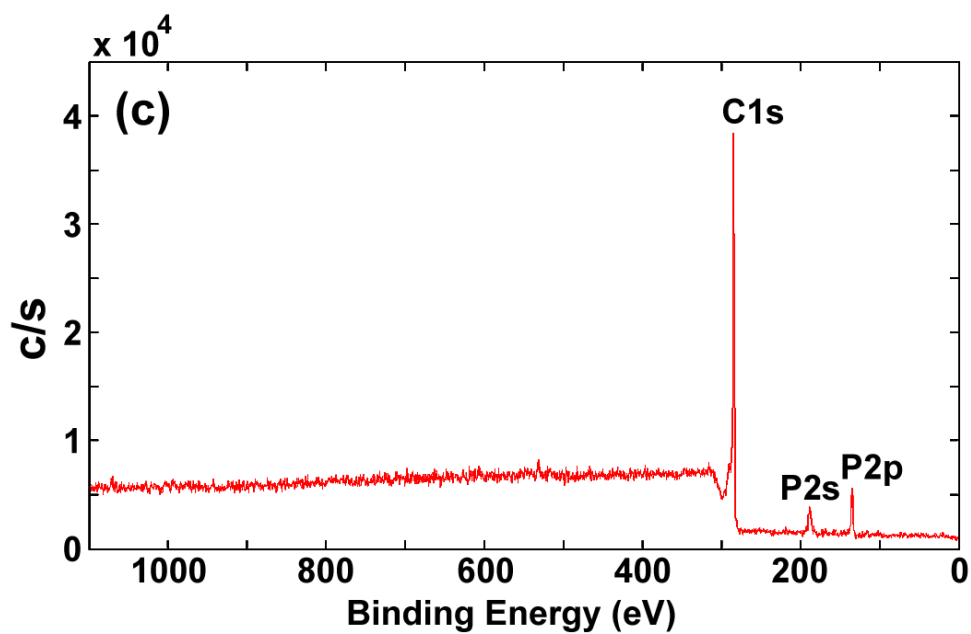

**Figure S2c.** XPS survey scan of phosphorous-substituted carbon scaffold.

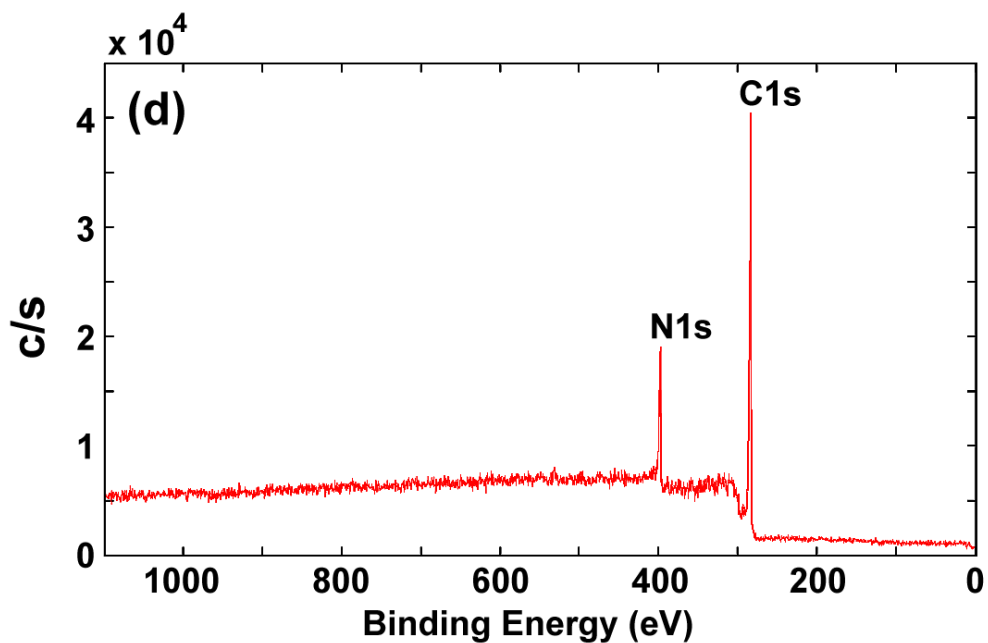

**Figure S2d.** XPS survey scan of nitrogen-substituted carbon scaffold.



### S3. EFTEM elemental mapping of heteroatom-substituted carbon scaffolds

Figure S3a-f show TEM images (left) and EFTEM elemental mapping of carbon (middle) and substituted atoms (right) of heteroatom-substituted carbon scaffolds: boron (a, b, c) and phosphorous (d, e, f). The carbon atoms are represented by green dots, while the substituted atoms are represented by red dots.

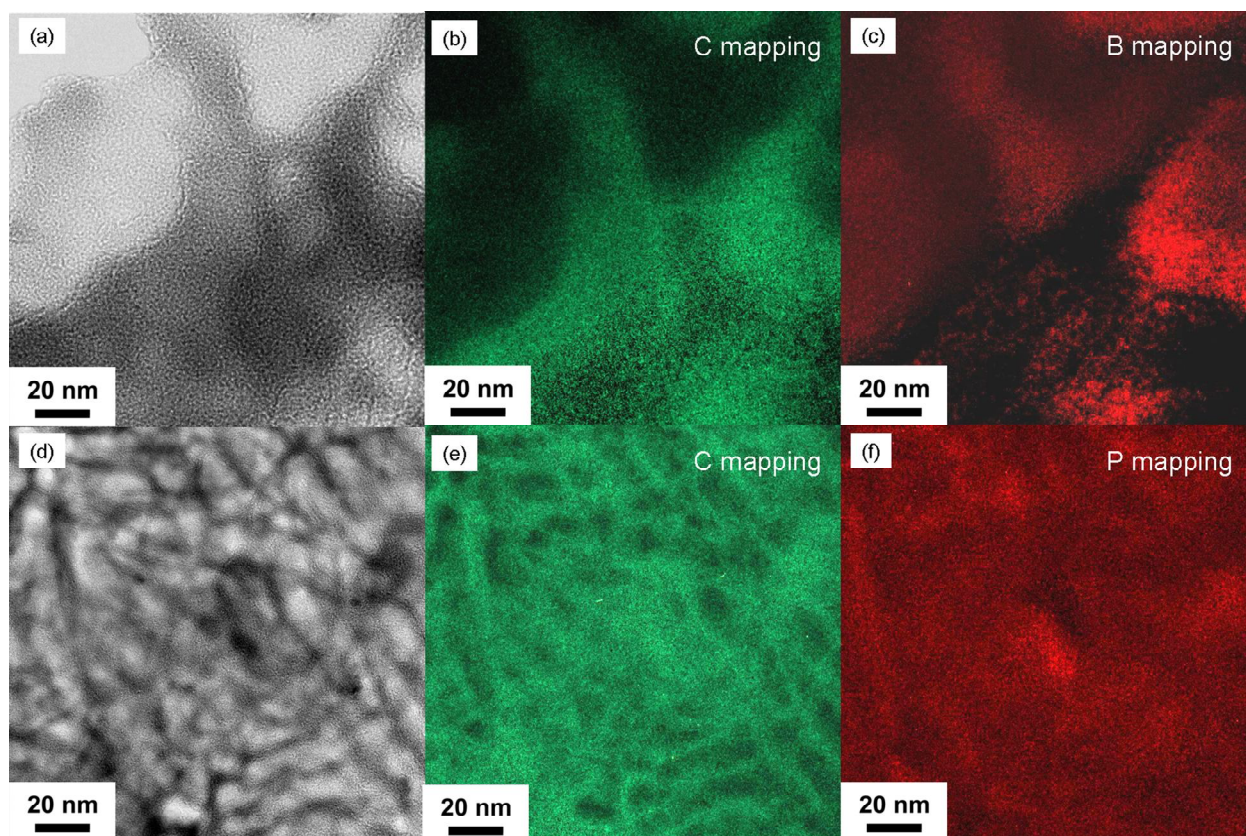

Figure S3g-j show TEM image (top left) and EFTEM elemental mapping of boron/phosphorous co-substituted carbon scaffold. Carbon atoms are still represented by green dots, boron atoms are represented by red dots, and phosphorous atoms are represented by yellow dots.

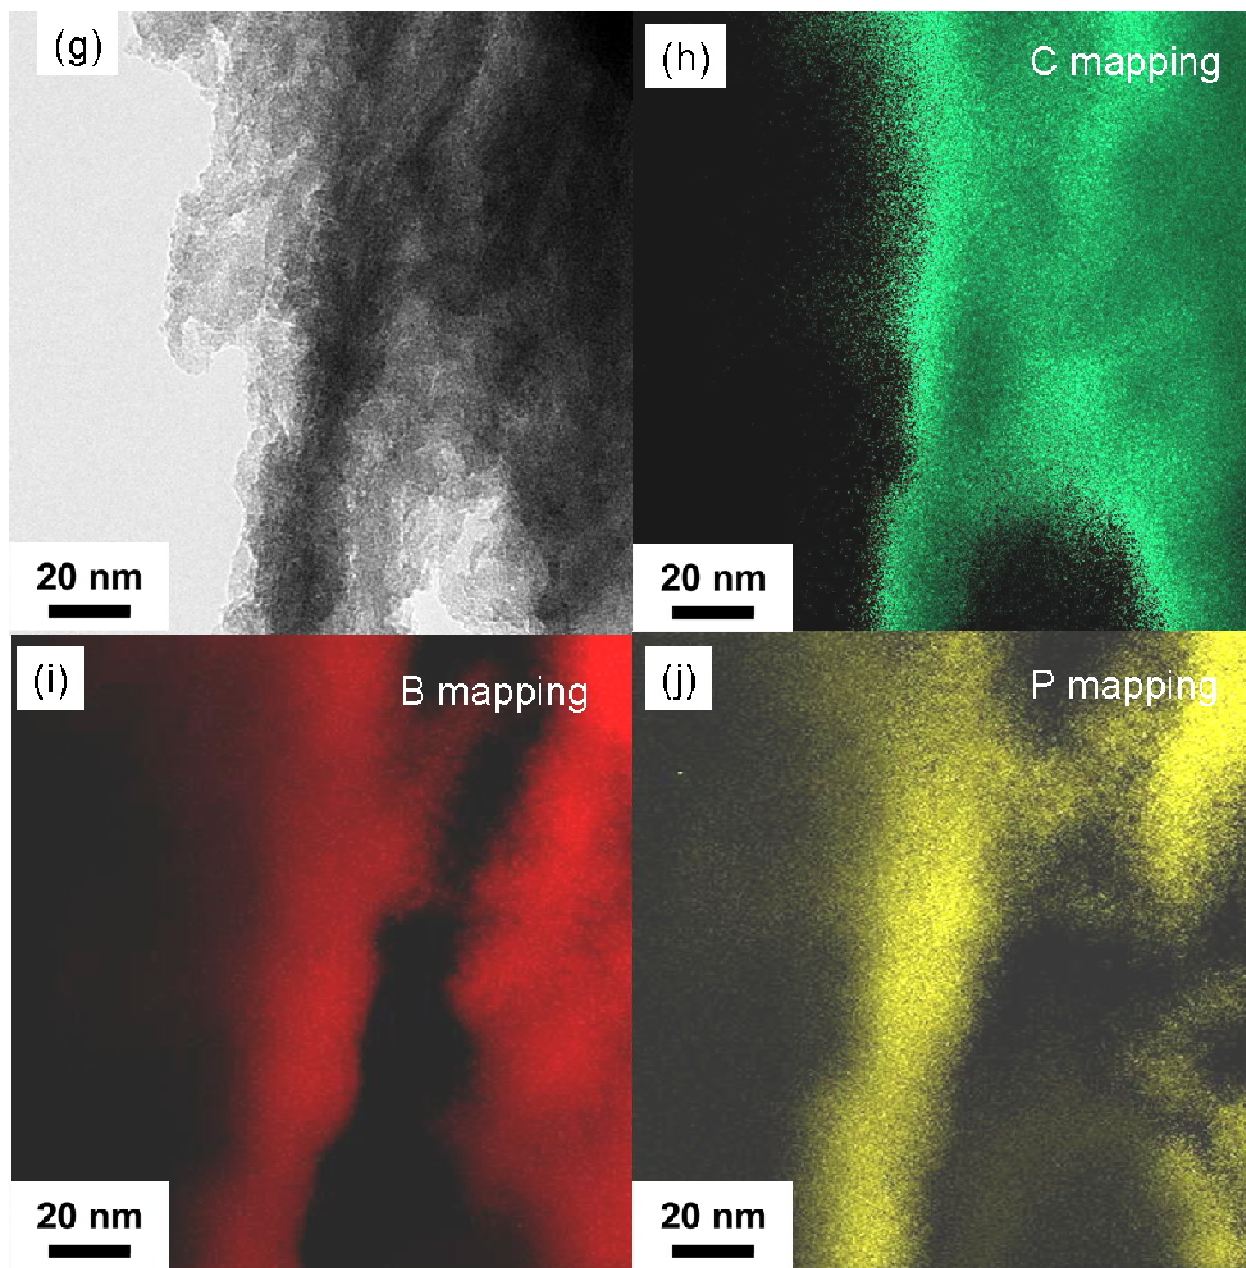



#### S4. Pore size distribution of pristine and heteroatom-substituted carbon scaffolds

Figure S4a-f show the pore size distribution of pristine and heteroatom-substituted carbon scaffolds calculated using the BJH (Barrett-Joyner-Halenda) method with the nitrogen BET adsorption data. All of the carbon scaffolds exhibit narrow peaks between 2.3-2.8 nm pore diameter and a shoulder peak extending to the atomic scale micropores. The values for the heteroatom-substituted carbon scaffolds are larger than the peak due to the pristine carbon scaffolds at the same range. As shown in the Figure S4d, in contrast to the pristine, boron- or phosphorous-substituted carbon scaffolds, the nitrogen-substituted carbon scaffolds have only a small shoulder peak extending to the atomic scale micropores.

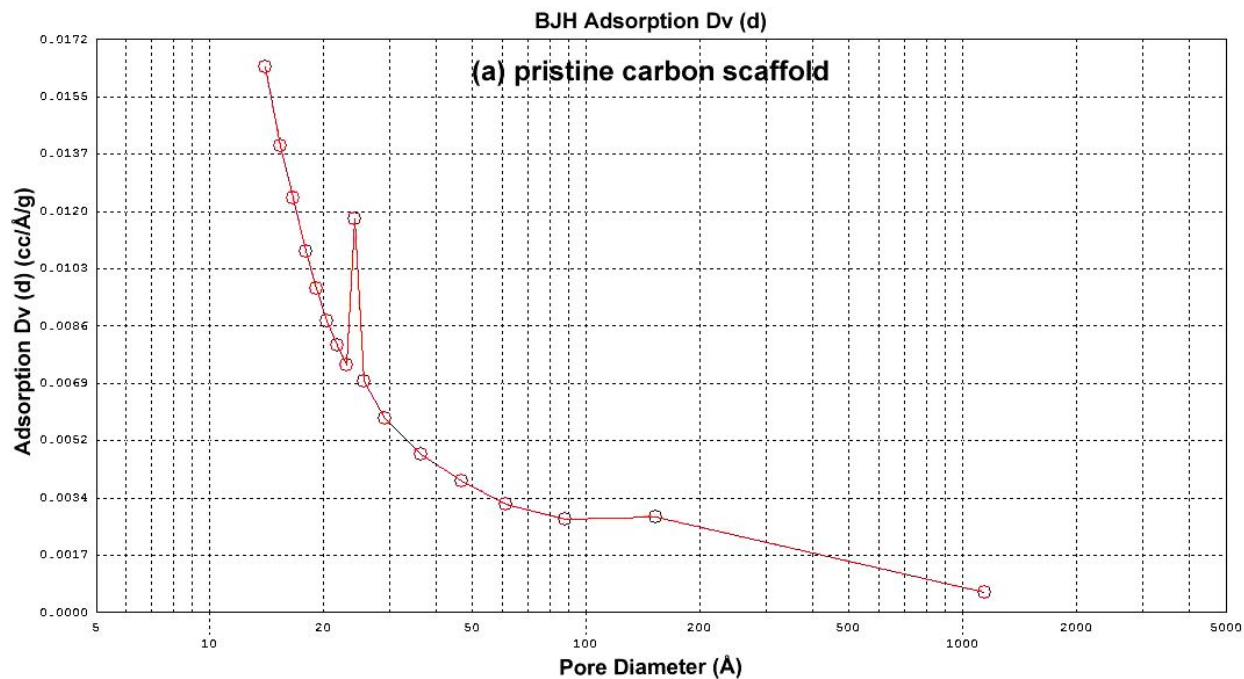

**Figure S4a.** Pore size distribution of pristine carbon scaffold.



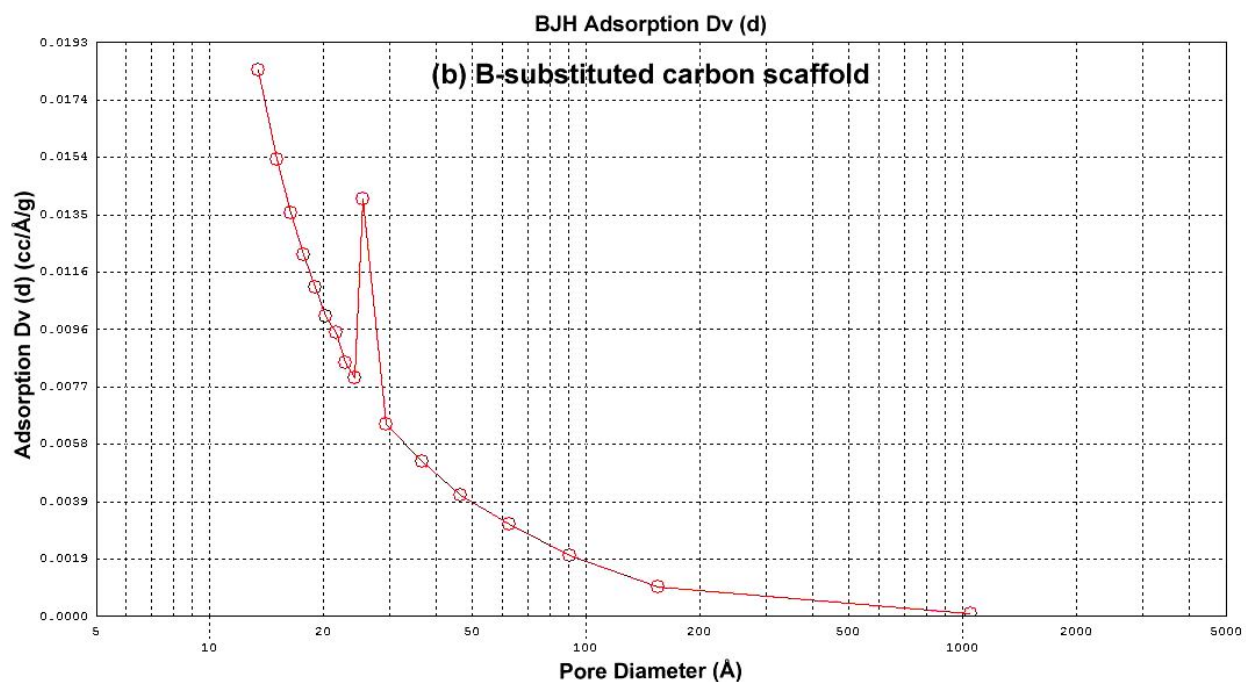

**Figure S4b.** Pore size distribution of boron-substituted carbon scaffold.

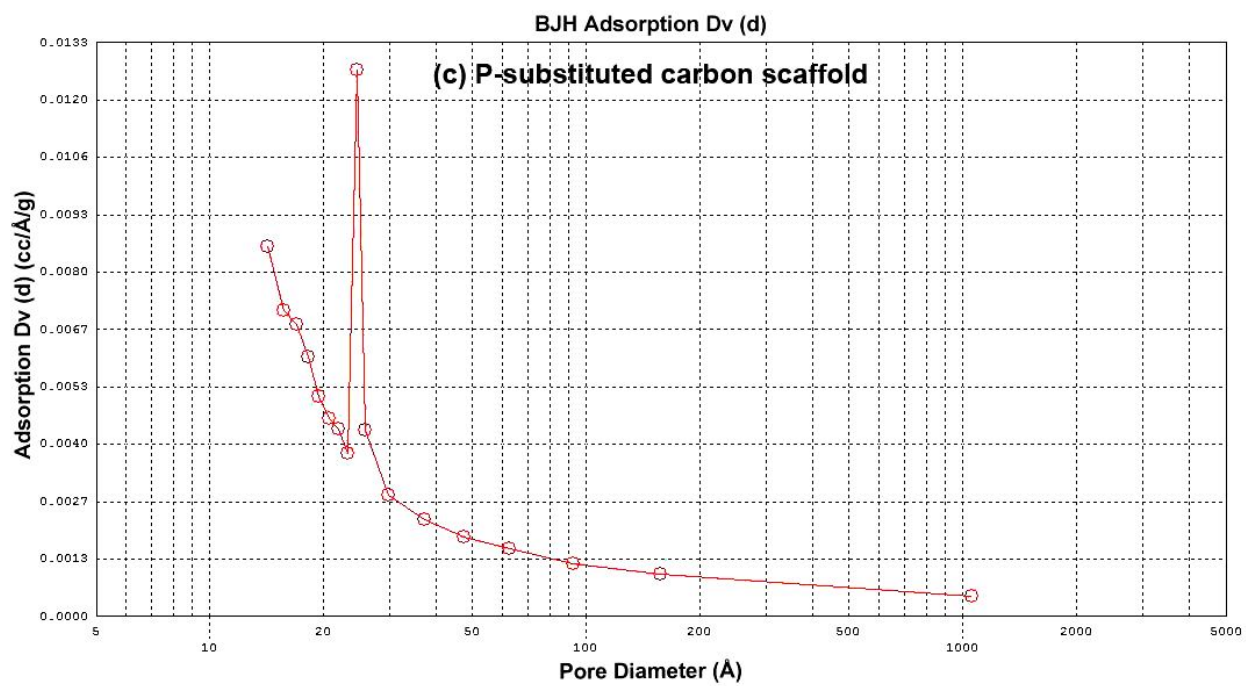

**Figure S4c.** Pore size distribution of phosphorous-substituted carbon scaffold.

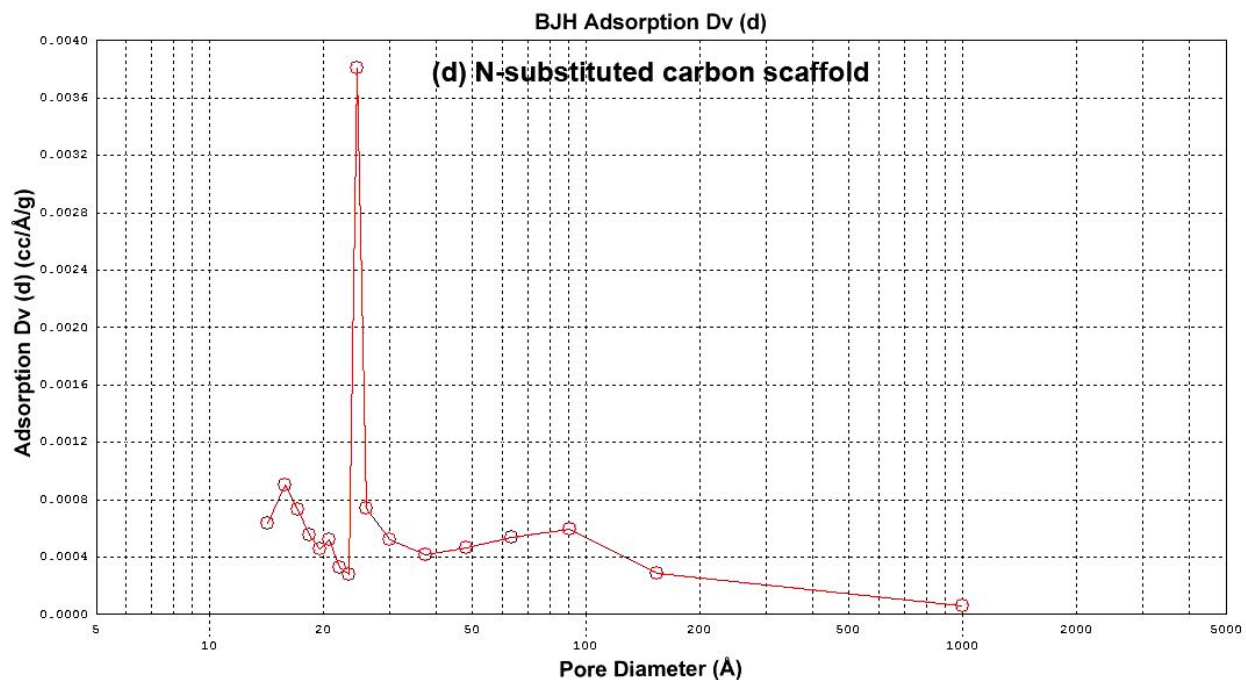

**Figure S4d.** Pore size distribution of nitrogen-substituted carbon scaffold.

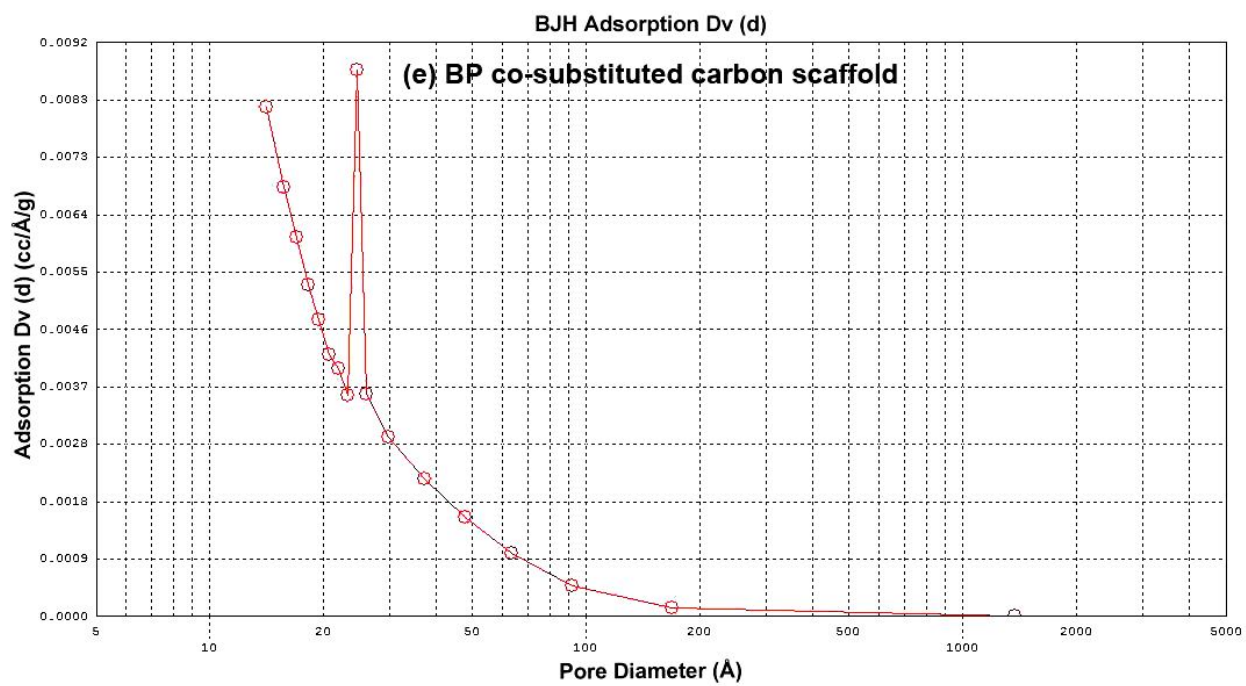

**Figure S4e.** Pore size distribution of boron/phosphorous co-substituted carbon scaffold.

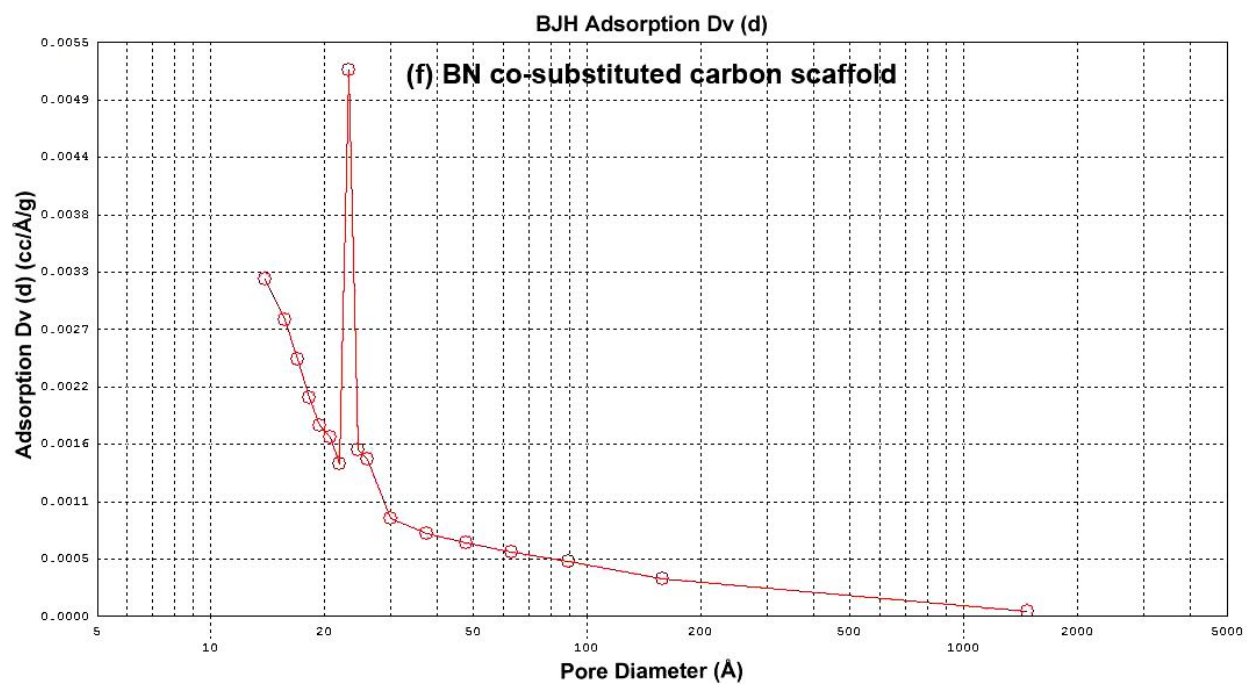

**Figure S4f.** Pore size distribution of boron/nitrogen co-substituted carbon scaffold.
